# Supplementary material for: Acute Footshock Stress Induces Time-Dependent Modifications of AMPA/NMDA Protein Expression and AMPA Phosphorylation
Source: Hindawi journal article supplement (doi:10.1155/2016/7267865), 2016-01-01
Supplement: f1 [file 7267865.f1.pdf]

1 **Supplemental Figure 1**

2

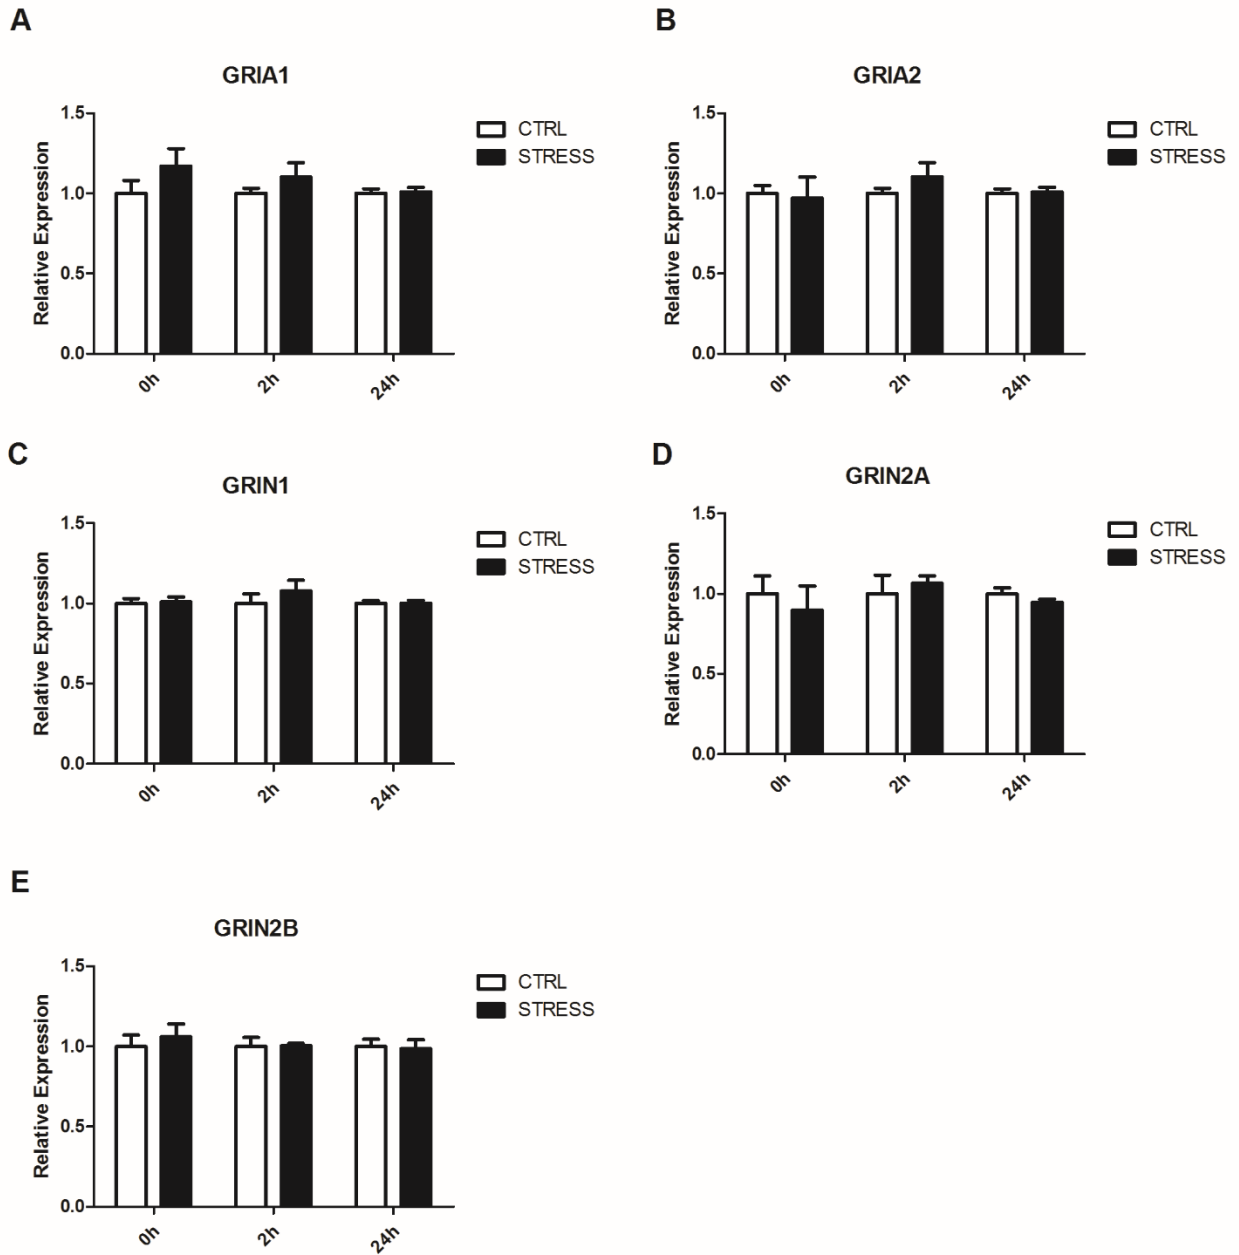

3

4 **Supplemental Figure 1.** Expression levels of GRIA1, GRIA2, GRIN1, GRIN2A, GRIN2B mRNA  
5 by qPCR. Data are reported as  $2^{-\Delta\Delta ct}$  (expression level of control sample is equal to 1) and represent  
6 mean values and standard errors obtained from at least three independent evaluations.

7

8 Supplemental Figure 2

9

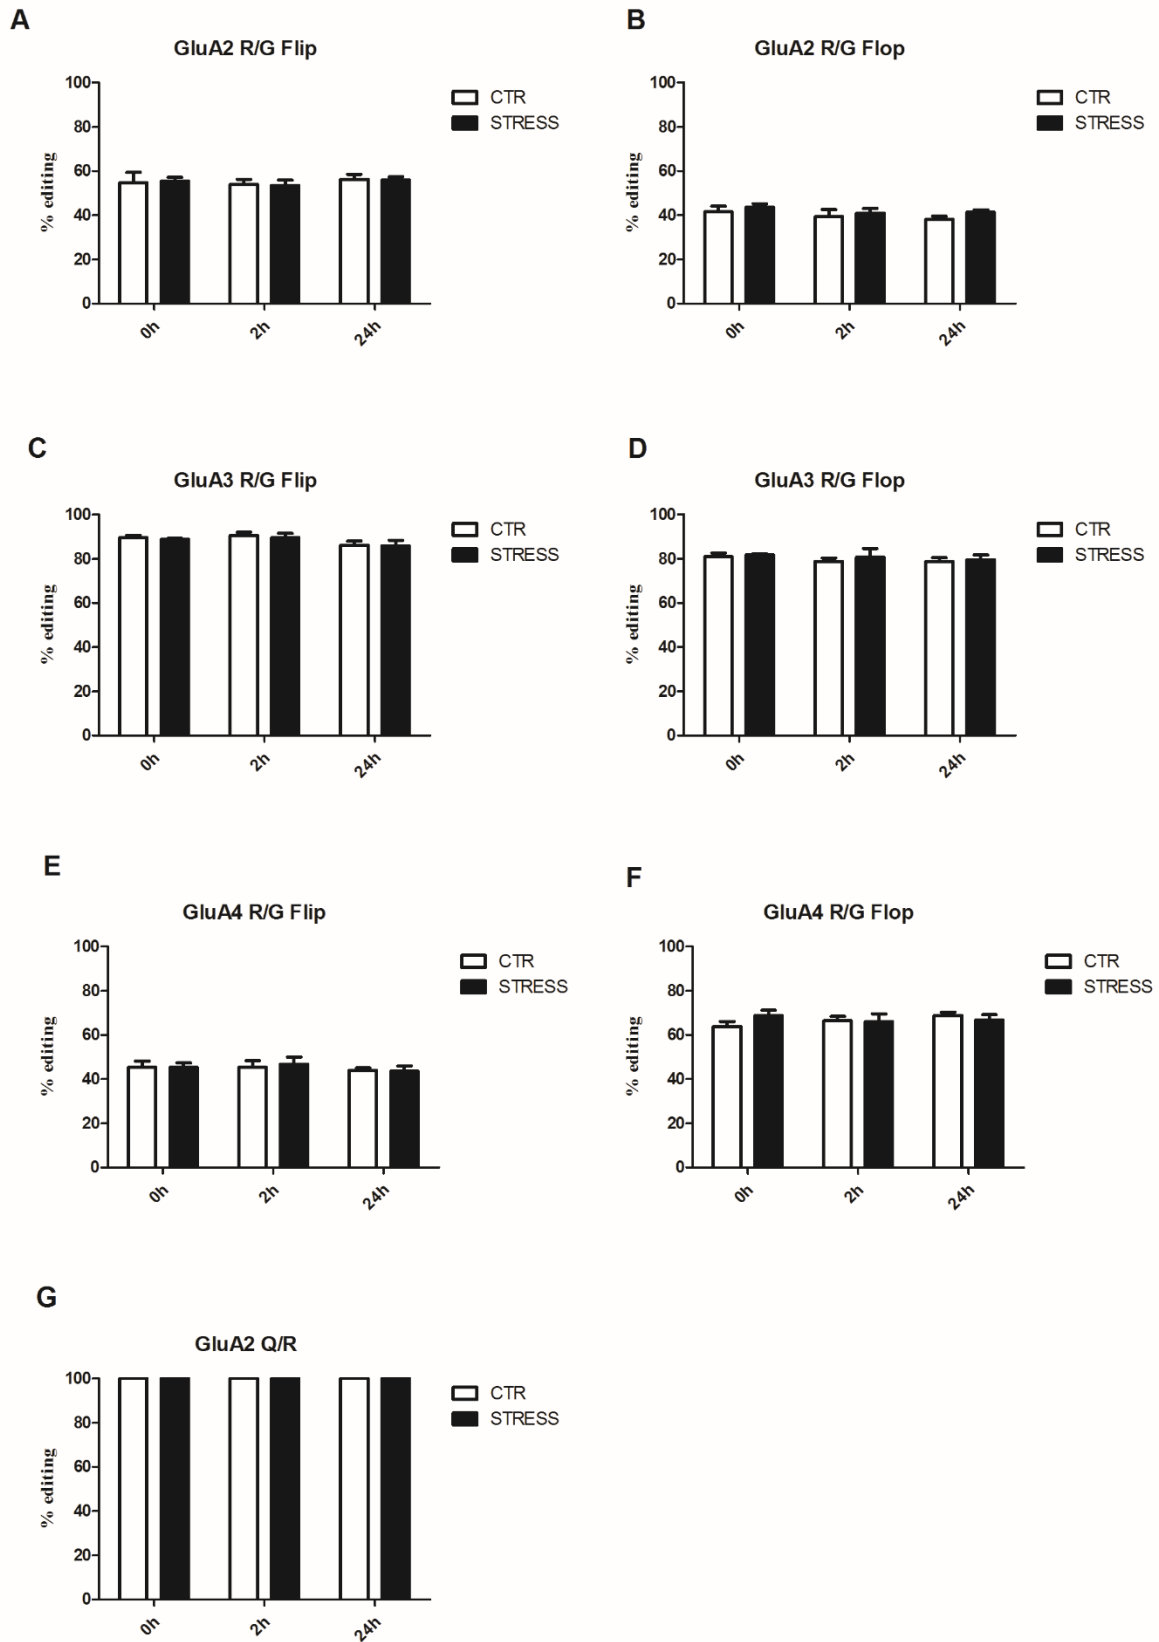

10

11 Supplemental Figure 2: Editing levels of AMPA receptor editing sites after acute stress.
